# Supplementary material for: Silver Nanoparticle-Based Fluorescence-Quenching Lateral Flow Immunoassay for Sensitive Detection of Ochratoxin A in Grape Juice and Wine
Source: PubMed Central journal article supplement (PMC5371838; doi:10.3390/toxins9030083), 2017-02-28
Supplement: toxins-09-00083-s001.pdf [file toxins-09-00083-s001.pdf]

# Supplementary Materials: Silver Nanoparticle-based Fluorescence-quenching Lateral Flow Immunoassay for Sensitive Detection of Ochratoxin A in Grape Juice and Wine

Hu Jiang, Xiangmin Li, Ying Xiong, Ke Pei, Lijuan Nie and Yonghua Xiong

**Table S1.** Optimization of AgNP probe contents and BSA–OTA concentrations

| No.             | Volume of AgNP probes ( $\mu\text{L}$ ) <sup>a</sup> | OTA-BSA Con. (mg/mL) | FI <sub>T</sub> (OTA-free sample) | FI <sub>T</sub> (0.5 ng/mL of OTA sample) |
|-----------------|------------------------------------------------------|----------------------|-----------------------------------|-------------------------------------------|
| 1               | 3                                                    | 0.4                  | 340                               | 398                                       |
| 2               | 3                                                    | 0.8                  | 226                               | 326                                       |
| 3               | 3                                                    | 1.2                  | 264                               | 341                                       |
| 4               | 3                                                    | 1.6                  | 211                               | 336                                       |
| 5               | 3                                                    | 2.0                  | 187                               | 259                                       |
| 6               | 4                                                    | 0.4                  | 269                               | 403                                       |
| 7               | 4                                                    | 0.8                  | 134                               | 274                                       |
| 8               | 4                                                    | 1.2                  | 216                               | 302                                       |
| 9               | 4                                                    | 1.6                  | 202                               | 259                                       |
| 10              | 4                                                    | 2.0                  | 149                               | 192                                       |
| 11              | 5                                                    | 0.4                  | 197                               | 331                                       |
| 12              | 5                                                    | 0.8                  | 62.4                              | 254                                       |
| 13 <sup>b</sup> | 5                                                    | 1.2                  | 0.00                              | 254                                       |
| 14              | 5                                                    | 1.6                  | 0.00                              | 216                                       |
| 15              | 5                                                    | 2.0                  | 0.00                              | 173                                       |
| 16              | 7.5                                                  | 0.4                  | 149                               | 269                                       |
| 17              | 7.5                                                  | 0.8                  | 0.00                              | 120                                       |
| 18              | 7.5                                                  | 1.2                  | 0.00                              | 173                                       |
| 19              | 7.5                                                  | 1.6                  | 0.00                              | 139                                       |
| 20              | 7.5                                                  | 2.0                  | 0.00                              | 0.00                                      |

a: OD<sub>450</sub> value of AgNP probes is 1.5; b: the optimal parameter combination.

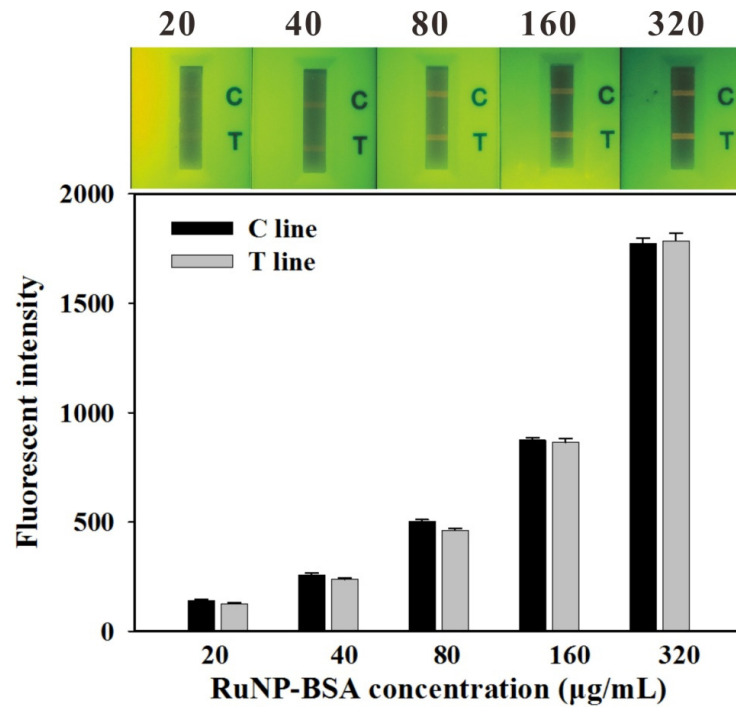

**Figure S1.** Fluorescence intensity values of test and control line zones under a series of RuNP-bovine serum albumin concentration recorded with a commercial strip reader (underneath) and the corresponding stereogram of the lateral flow immunoassay sensor under a 450 nm LED light excitation (above). The vertical bars indicate the standard deviation ( $n = 3$ ).

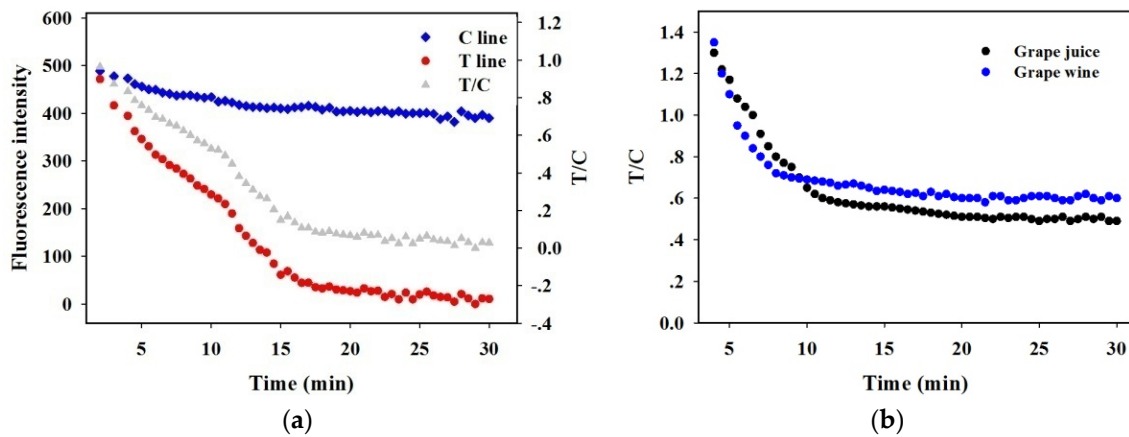

**Figure S2.** (a) Immunoreaction kinetic curves of FIr, FIc, and T/C ratio by running in phosphate buffer solution containing 0.05 ng/mL of OTA; (b) Immunoreaction kinetic curves of T/C ratio by running red grape wine and juice samples containing 0.5 ng/mL of OTA.

**Table S2.** Comparison of the published LFIA with AgNP–RuNP–cLFIA sensor for OTA detection.

| Reference                            | Label/signal | LOD (µg/kg) | Samples     | LFIA type   |
|--------------------------------------|--------------|-------------|-------------|-------------|
| Lai et al. <sup>[1]</sup> (2009)     | AuNPs        | 10          | Cereal      | Qualitative |
| Anfossi et al. <sup>[2]</sup> (2011) | AuNPs        | 1.5         | Cereal      | Qualitative |
| Anfossi et al. <sup>[3]</sup> (2012) | AuNPs        | 1           | Grape juice | Qualitative |
|                                      |              | 1           | wine        |             |
| Sun et al. <sup>[4]</sup> (2016)     | AuNPs        | 0.77        | Cereal      | Qualitative |
| This study                           | AgNPs/RuNPs  | 0.16        | Grape juice | Qualitative |
|                                      |              | 0.31        | wine        |             |

## References

1. Lai, W.; Fung, D.Y.C.; Yang, X.; Renrong, L.; Xiong, Y. Development of a colloidal gold strip for rapid detection of ochratoxin A with mimotope peptide. *Food Control* **2009**, *20*, 791–795.
2. Anfossi, L.; D'Arco, G.; Baggiani, C.; Giovannoli, C.; Giraudi, G. A lateral flow immunoassay for measuring ochratoxin A: development of a single system for maize, wheat and durum wheat. *Food Control* **2011**, *22*, 1965–1970.
3. Anfossi, L.; Giovannoli, C.; Giraudi, G.; Biagioli, F.; Passini, C.; Baggiani, C. A Lateral flow immunoassay for the rapid detection of ochratoxin A in wine and grape must. *J. Agr. Food Chem.* **2012**, *60*, 11491–11497.
4. Sun, Y.; Xing, G.; Yang, J.; Wang, F.; Deng, R.; Zhang, G.; Hu, X.; Zhang, Y. Development of an immunochromatographic test strip for simultaneous qualitative and quantitative detection of ochratoxin A and zearalenone in cereal. *J. Sci. Food Agric.* **2016**, *96*, 3673–3678.
